# Supplementary material for: A Benefit-Cost Analysis of BackTrack, a Multi-Component, Community-Based Intervention for High-Risk Young People in a Rural Australian Setting
Source: Int J Environ Res Public Health. 2022 Aug 18;19(16):10273. doi: 10.3390/ijerph191610273 (PMC9408498; doi:10.3390/ijerph191610273)
Supplement: Supplementary file 1 [file ijerph-19-10273-s001.zip › ijerph-1797165-supplementary.pdf]

**Supplementary Table S1: Costs and benefits of BackTrack by year of analysis.**

|                                                        | Mar-12 to<br>Feb-13 | Mar-13 to<br>Feb-14 | Mar-14 to<br>Feb-15 | Mar-15 to<br>Feb-16 | Mar-16 to<br>Feb-17 | Mar-17 to<br>Feb-18 | Mar-18 to<br>Feb-19 | Mar-19 to<br>Feb-20 | Mar-20 to<br>Feb-21 |
|--------------------------------------------------------|---------------------|---------------------|---------------------|---------------------|---------------------|---------------------|---------------------|---------------------|---------------------|
| <b>Costs</b>                                           |                     |                     |                     |                     |                     |                     |                     |                     |                     |
| Infrastructure & Equipment                             | \$24,390            | \$51,025            | \$46,933            | \$58,509            | \$46,641            |                     |                     |                     |                     |
| Operating costs (Labour)                               | \$273,833           | \$493,882           | \$596,317           | \$688,619           | \$512,297           |                     |                     |                     |                     |
| Operating costs (Non-labour)                           | \$87,436            | \$130,005           | \$176,799           | \$281,791           | \$194,475           |                     |                     |                     |                     |
| Additional health service costs                        | \$0                 | \$975               | \$6,824             | \$11,699            | \$8,774             | \$1,950             | \$2,437             | \$2,925             |                     |
| Administration of tax transfers                        | \$2,825             | \$3,183             | \$1,667             | \$2,188             | \$899               |                     |                     |                     |                     |
| <b>Total costs</b>                                     | \$388,484           | \$679,070           | \$828,541           | \$1,042,807         | \$763,086           | \$1,950             | \$2,437             | \$2,925             |                     |
| <b>Total costs (discounted)</b>                        | \$388,484           | \$634,645           | \$723,680           | \$851,241           | \$582,155           | \$1,390             | \$1,624             | \$1,821             |                     |
| <b>Benefits</b>                                        |                     |                     |                     |                     |                     |                     |                     |                     |                     |
| Program Income                                         | \$34,230            | \$67,913            | \$76,811            | \$93,382            | \$33,838            |                     |                     |                     |                     |
| Education/Training - Job training, literacy & numeracy |                     | \$4,677             | \$32,738            | \$56,121            | \$42,091            | \$9,354             | \$11,692            | \$14,030            |                     |
| Education/Training - High school                       |                     |                     |                     | \$260,923           | \$334,026           | \$125,213           | \$62,607            | \$36,551            | \$62,607            |
| Education/Training - Vocational further education      |                     |                     |                     | \$88,732            | \$88,732            |                     |                     | \$44,366            |                     |
| Physical health - Engagement with health services      |                     |                     | \$41,076            | \$70,415            | \$52,811            | \$11,736            | \$14,670            | \$17,604            |                     |
| Homelessness & housing                                 |                     |                     |                     | \$93,176            | \$46,588            |                     |                     |                     |                     |
| Employment - Increased productivity                    |                     |                     | \$1,198,201         | \$599,100           | \$1,903,824         | \$299,550           | \$299,550           | \$652,362           |                     |
| Local Government - Infrastructure vandalism (savings)  | \$33,666            | \$33,666            | \$33,666            | \$33,666            | \$33,666            |                     |                     |                     |                     |
| Crime                                                  | \$12,929            | \$99,683            | \$229,995           | \$346,570           | \$450,857           | \$88,332            |                     |                     |                     |
| <b>Total Benefits</b>                                  | \$80,825            | \$205,939           | \$1,612,486         | \$1,642,087         | \$2,986,434         | \$534,185           | \$388,519           | \$764,913           | \$62,607            |
| <b>Total Benefits (disc.)</b>                          | <b>\$80,825</b>     | <b>\$192,466</b>    | <b>1,408,408</b>    | <b>\$1,340,432</b>  | <b>\$2,278,336</b>  | <b>\$380,867</b>    | <b>\$258,886</b>    | <b>\$476,350</b>    | <b>\$36,438</b>     |
| <b>Net Social Benefit</b>                              | -\$307,659          | -\$473,131          | \$783,946           | \$599,280           | \$2,223,347         | \$532,235           | \$386,081           | \$761,989           | \$62,607            |
| <b>Net Social Benefit (disc.)</b>                      | <b>-\$307,659</b>   | <b>-\$442,179</b>   | <b>\$684,729</b>    | <b>\$489,191</b>    | <b>\$1,696,181</b>  | <b>\$379,476</b>    | <b>\$257,262</b>    | <b>\$474,528</b>    | <b>\$36,438</b>     |
